# Supplementary material
Source: PubMed Central journal article supplement (PMC2705549)
Supplement: 0903809106_ST1_PDF.pdf [file 0903809106_ST1_PDF.pdf]

---

**Table S1. Simulated systems**

---

| Enzyme                       | C <sub>2</sub>                                                                    |                    | AldO                                                                                |                                                                 |
|------------------------------|-----------------------------------------------------------------------------------|--------------------|-------------------------------------------------------------------------------------|-----------------------------------------------------------------|
|                              | 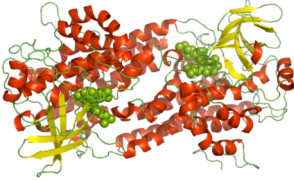 |                    |  |                                                                 |
| PDB ID initial coordinates   | 2jbs                                                                              | 2jbs               | 2vfr                                                                                | 2vfr                                                            |
| <i>T</i> [K]                 | 300                                                                               | 350                | 300                                                                                 | 350                                                             |
| nr. O <sub>2</sub> molecules | 100                                                                               | 100                | 100                                                                                 | 100                                                             |
| cofactor                     | FMNH <sup>-</sup>                                                                 | FMNH <sup>-</sup>  | FADH <sup>-</sup>                                                                   | FADH <sup>-</sup>                                               |
| nr. solute atoms             | 8267                                                                              | 8267               | 4009                                                                                | 4009                                                            |
| nr. solvent molecules        | 35028                                                                             | 35028              | 15342                                                                               | 15342                                                           |
| nr. atoms in the system      | 113360                                                                            | 113360             | 50245                                                                               | 50245                                                           |
| nr. of ions                  | 12 Na <sup>+</sup>                                                                | 12 Na <sup>+</sup> | 1 Cl <sup>-</sup> ,<br>3 Mg <sup>2+</sup> ,<br>6 K <sup>+</sup>                     | 1 Cl <sup>-</sup> ,<br>3 Mg <sup>2+</sup> ,<br>6 K <sup>+</sup> |
| total system charge          | 0                                                                                 | 0                  | 0                                                                                   | 0                                                               |
| equilibration period [ns]    | 1.8                                                                               | 2.7                | 2.7                                                                                 | 2.7                                                             |
| nr. MD replicas              | 5                                                                                 | 5                  | 5                                                                                   | 5                                                               |
| equilibrium period [ns]      | 3.0                                                                               | 3.0                | 5.0                                                                                 | 5.0                                                             |

---
